# Supplementary material for: Spin dynamics of tri-addition endohedral nitrogen fullerene with transversal chemical functionalization
Source: Royal Society of Chemistry journal article supplement (doi:10.1039/d4tc05081a), 2025-01-01
Supplement: d4tc05081a1.pdf [file d4tc05081a1.pdf]

# Supporting Information

## **Spin Dynamic of Tri-addition Endohedral Nitrogen Fullerene with Transversal Chemical Functionalization**

Cong-Hui Wu, Yu-jin Wu, Jia-Yue Yuan, Zhi-Rong Wu, Qi Xiong, Li-Nan Zhou, Song Gao, Shen Zhou, Shang-Da Jiang

# Supporting Information

## Contents

**SI 1: Mass Spectra for products 3 and 5**

**SI 2:  $T_1$  measurement of 3 and 5 powder at 3456 G**

**SI 3:  $T_m$  measurement of 3 and 5**

**SI 4:  $T_m$  measurement of 3 and 5 with CPMG dynamic decoupling**

**SI 5: Rabi oscillations of 3 and 5**

## SI 1: Mass Spectra for products 3 and 5

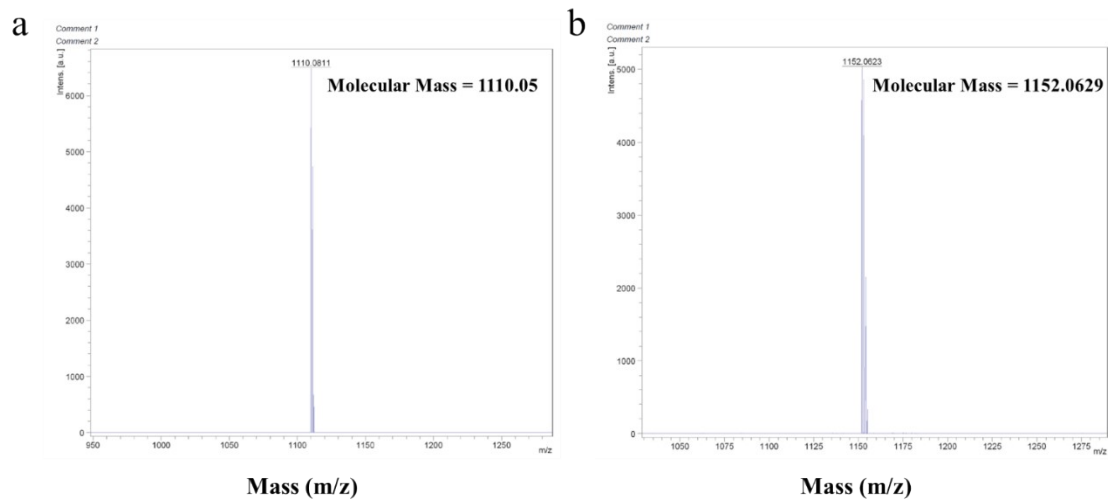

**Figure S1** MALDI-TOF-MS of a) 3, b) 5 (Trans-2-[3-(4-tert-Butylphenyl)-2-methyl-2-propenylidene] malononitrile and negative mode)

## SI 2: $T_1$ measurement of 3 and 5 powder at 3456 G

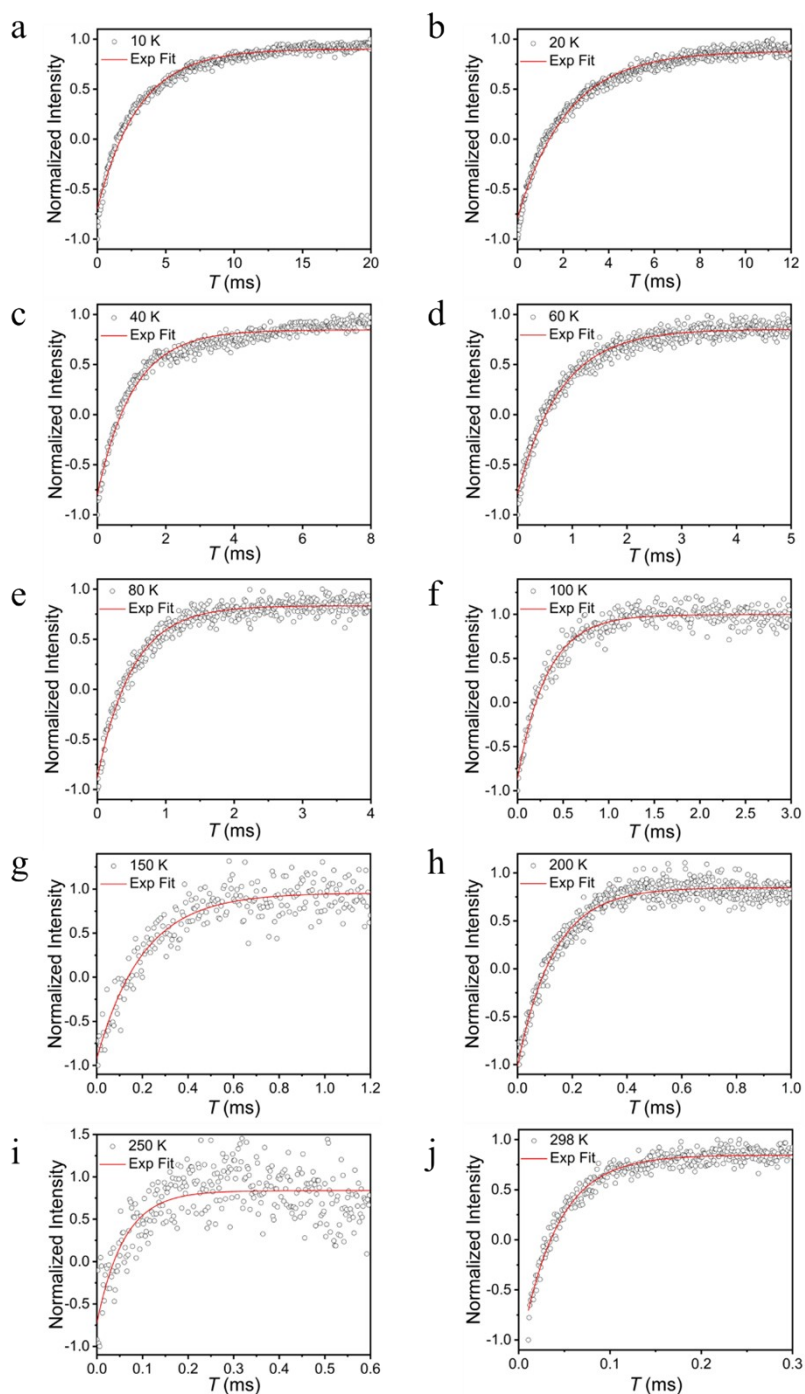

**Figure S2** (a-j)  $T_1$  data (black point) measured at different temperatures at 3456 G and individual exponential fitting curves (red line) for 3 powder. At higher temperatures, the signal becomes weaker, necessitating more repetitions to obtain reliable results. The shots per point for Figure S2 h and i (200 and 250 K) are twice as many as those used for Figure S2 a–g (from 10 to 150 K), and the shots per point for Figure S2 j (298 K) are four times greater than those used for Figure S2 a–g.

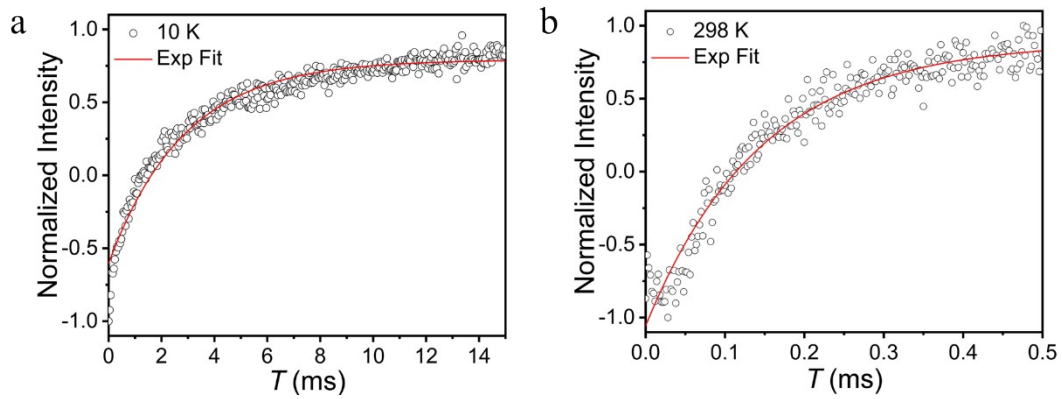

**Figure S3**  $T_1$  data measured at 10 K and 298K at 3456 G for 5 powder.

Table S1.  $T_1$  data between 10-250 K of 3 powder at 3456 G.

| $T / \text{K}$ | $3-T_1 / \text{ms}$ |
|----------------|---------------------|
| 10             | 3.005               |
| 20             | 2.19                |
| 40             | 1.042               |
| 60             | 0.787               |
| 80             | 0.51                |
| 100            | 0.322               |
| 150            | 0.202               |
| 200            | 0.132               |
| 250            | 0.06                |
| 298            | 0.04                |

Table S2.  $T_1$  data of 5 powder at 10 K and 3456 G.

| $T / \text{K}$ | $5-T_1 / \text{ms}$ |
|----------------|---------------------|
| 10             | 2.847               |
| 298            | 0.146               |

### SI 3: $T_m$ measurement of 3 and 5

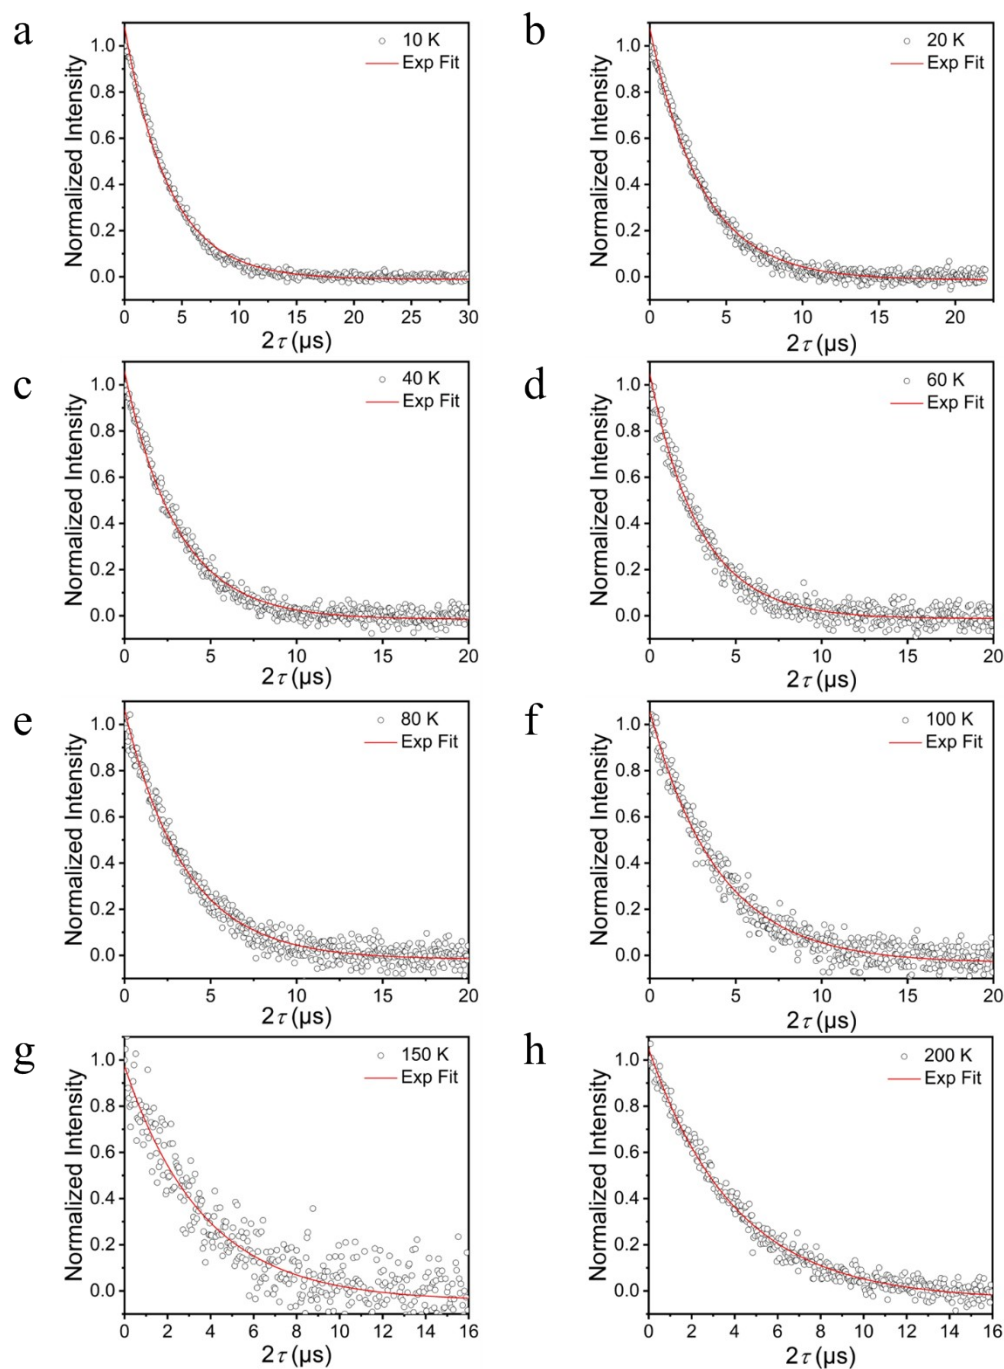

**Figure S4**  $T_m$  data (black point) measured at different temperatures at 3456 G and individual exponential fitting curves (red line) for 3 powder. The shots per point for Figure S4 h (200 K) are twice as many as those used for Figure S4 a–g (from 10 to 150 K).

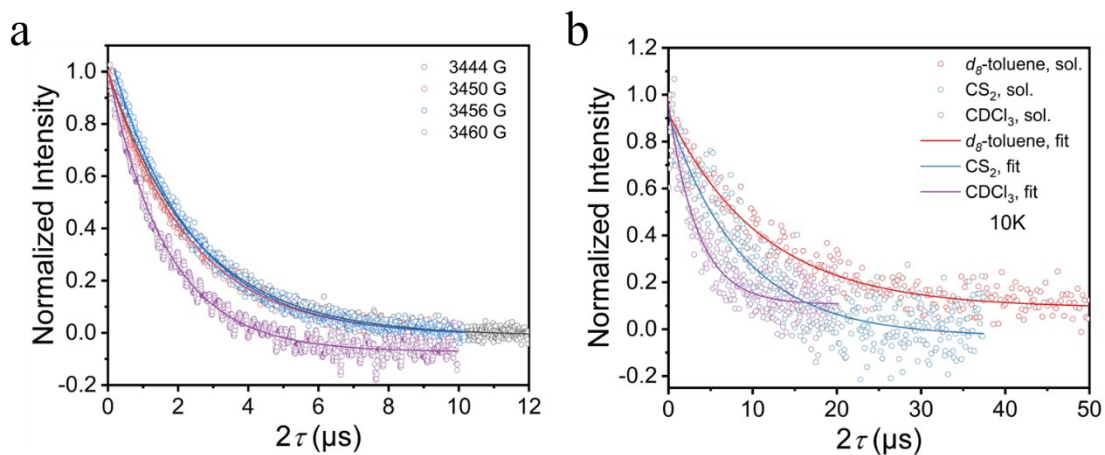

**Figure S5** (a)  $T_m$  data (point) measured in different fields at 298 K and individual exponential fitting curves (line) for 3 powder. (b)  $T_m$  data (point) measured in different solutions at 10 K at 3456 G and individual exponential fitting curves (line) for 3.



Table S3.  $T_m$  data between 10-298 K of 3 powder at 3456 G.

| $T / \text{K}$ | $3-T_m / \mu\text{s}$ |
|----------------|-----------------------|
| 10             | 3.852                 |
| 20             | 3.399                 |
| 40             | 3.06                  |
| 60             | 2.903                 |
| 80             | 3.504                 |
| 100            | 3.968                 |
| 150            | 3.639                 |
| 200            | 4.01                  |
| 298            | 2.282                 |

Table S4.  $T_m$  data of 3 in different fields at 298 K.

| Field | $3-T_m / \mu\text{s}$ |
|-------|-----------------------|
| 3444  | 2.456                 |
| 3450  | 2.311                 |
| 3456  | 2.282                 |
| 3460  | 1.666                 |

Table S5.  $T_m$  data of 3 in different solutions at 10 K and 3456 G.

| Solvent         | $3-T_m / \mu\text{s}$ |
|-----------------|-----------------------|
| $d_8$ -toluene  | 11.156                |
| $\text{CS}_2$   | 8.688                 |
| $\text{CDCl}_3$ | 3.469                 |

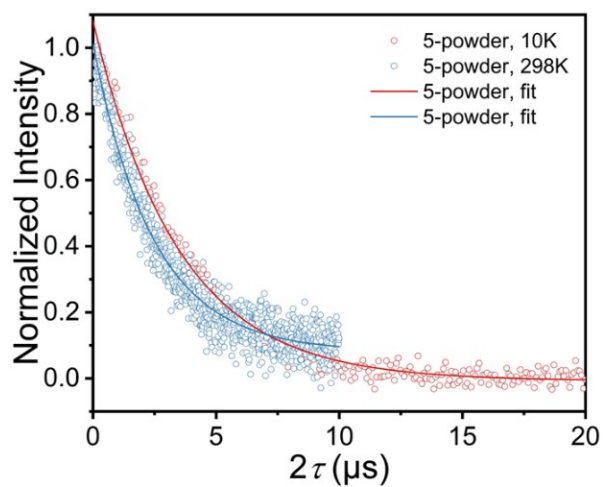

**Figure S6**  $T_m$  data (point) measured at 10 K and 298 K at 3456 G and individual exponential fitting curves (line) for 5 powder.

Table S5.  $T_m$  data of 5 powder at 10K and 298 K at 3456 G.

| $T / \text{K}$ | $5-T_m / \mu\text{s}$ |
|----------------|-----------------------|
| 10             | 3.448                 |
| 298            | 2.444                 |

#### SI 4: $T_m$ measurement of 3 and 5 powder with CPMG dynamic decoupling

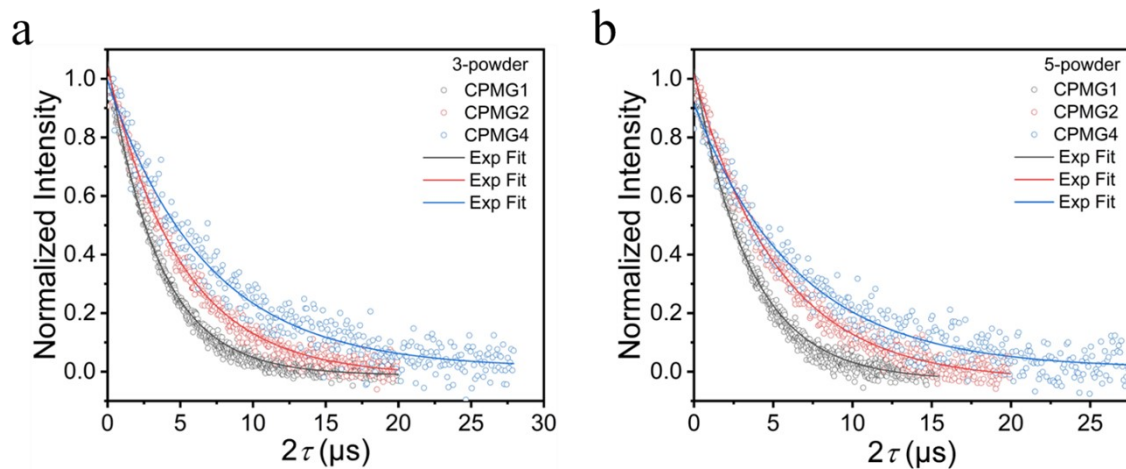

**Figure S7** CPMG data (point) measured at 10 K at 3456 G and individual exponential fitting curves (line) for (a) 3 powder. (b) 5 powder.

Table S6. CPMG data of 3 and 5 powder at 10 K and 3456 G.

| Inversion pulse number | 3- $T_m$ / $\mu$ s | 5- $T_m$ / $\mu$ s |
|------------------------|--------------------|--------------------|
| 1                      | 3.487              | 3.5                |
| 2                      | 5.034              | 5.318              |
| 4                      | 6.732              | 6.49               |

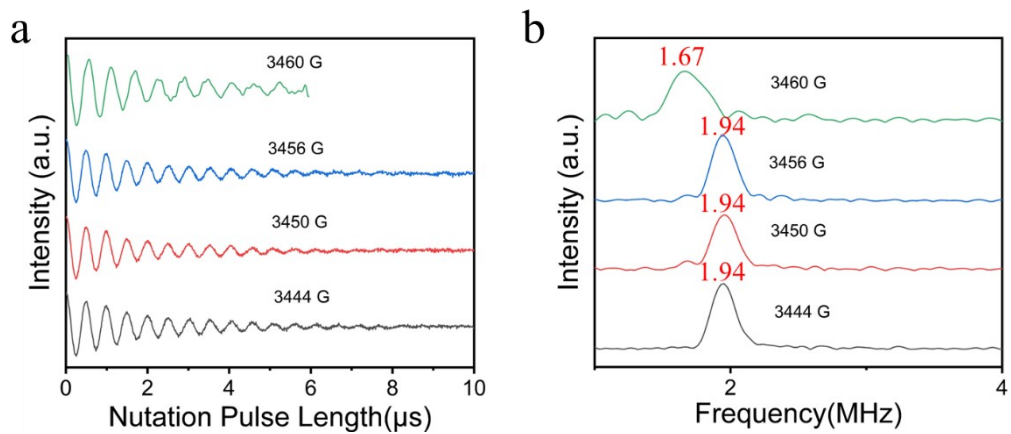

**SI 5: Rabi oscillations of 3 and 5**

**Figure S8** (a) Rabi oscillations of the 3 powder measured at different fields at 298 K, 18 dB. (b) FFT of Rabi oscillations measured at different fields at 298 K, 18 dB.

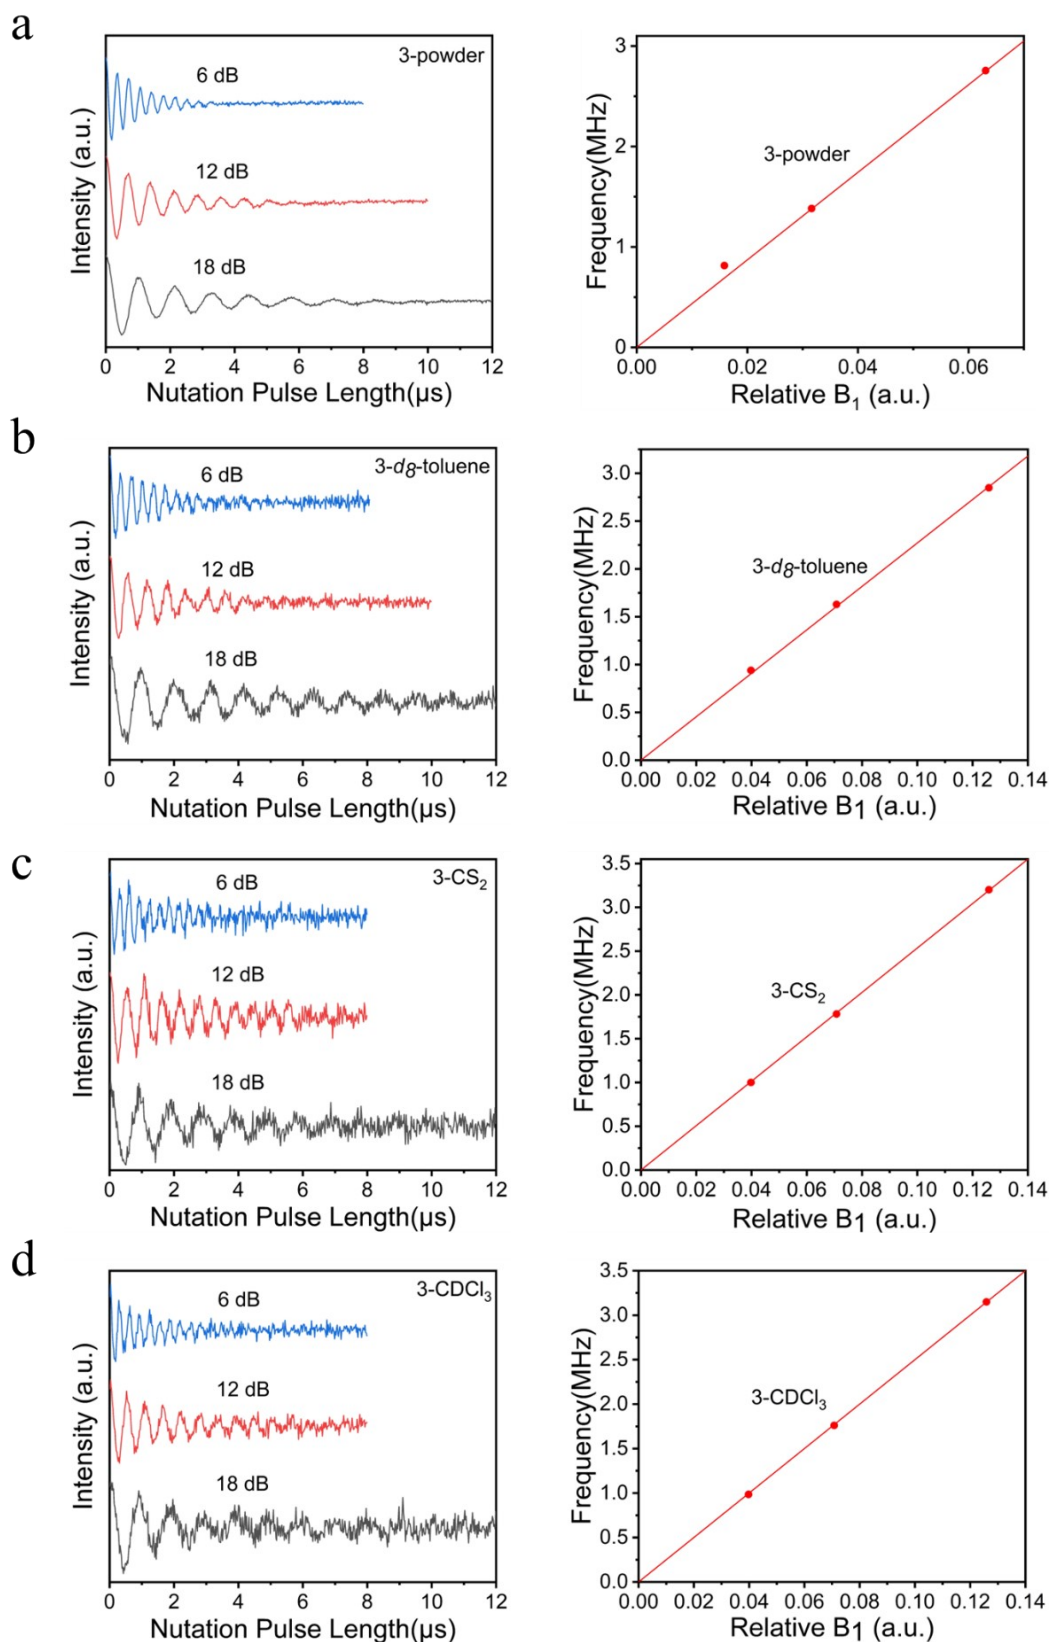

**Figure S9** Rabi oscillations of (a) 3 powder, (b) 3 in  $d_8$ -toluene, (c) 3 in  $\text{CS}_2$  and (d) 3 in  $\text{CDCl}_3$  frozen solutions at 10 K and 3456 G for different pulse powers. The Rabi frequencies  $f_{\text{Rabi}}$  exhibit a linear relationship with the microwave  $B_1$  field.

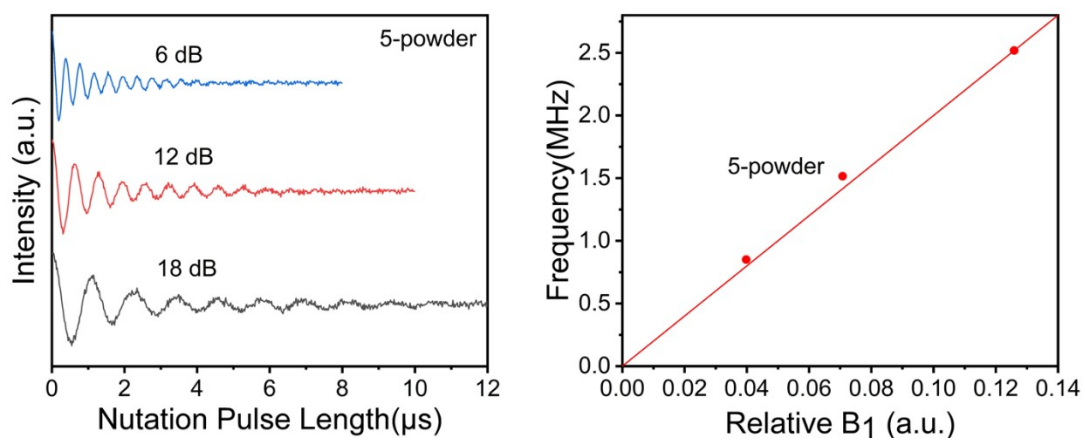

**Figure S10** Rabi oscillations of 5 powder at 10 K and 3456 G for different pulse powers. The Rabi frequencies  $f_{\text{Rabi}}$  exhibit a linear relationship with the microwave  $B_1$  field.
